# Supplementary material
Source: Royal Society of Chemistry journal article supplement (doi:10.1039/d5py01084e)
Supplement: d5py01084e1.pdf [file d5py01084e1.pdf]

## **A FAST EMULSION POLYMERIZATION IN AN OPEN-TO-AIR ENVIRONMENT**

Uddhab Kalita<sup>[a,b]</sup>, Vianna F. Jafari<sup>[a]</sup>, Shubham Verma<sup>[a,b]</sup>, Nikhil K. Singha<sup>\*[b]</sup>, Greg G. Qiao<sup>\*[a]</sup>

<sup>a</sup>Polymer Science Group, Department of Chemical Engineering, The University of Melbourne, Parkville 3010, Victoria, Australia

<sup>b</sup>Rubber Technology Centre, Indian Institute of Technology Kharagpur, Kharagpur 721302, WB, India

Corresponding Author's Email: [gregghq@unimelb.edu.au](mailto:gregghq@unimelb.edu.au), [nks@rtc.iitkgp.ac.in](mailto:nks@rtc.iitkgp.ac.in)

**Fenton Chemistry:** The Fenton reaction is a chemical process that involves the production of hydroxyl radicals (HO•) by activating (reducing) hydrogen peroxide (H<sub>2</sub>O<sub>2</sub>) with ferrous (Fe<sup>2+</sup>) ions. This complex reaction proceeds as follows:

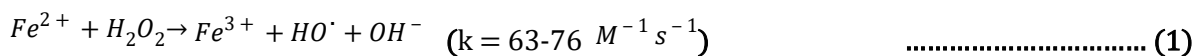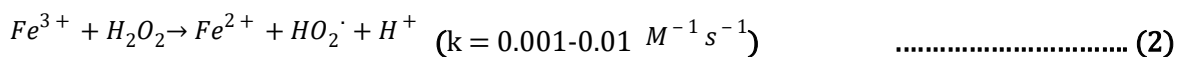

In situations where there is an excess of both H<sub>2</sub>O<sub>2</sub> and Fe<sup>2+</sup>, the hydroxyl radicals (HO•) generated in this process exhibit non-specific reactivity, leading to various competing reactions as described in Equations (3)-(5). These additional reactions are generally undesirable in other organic oxidation processes and are considered inhibitory pathways in the present study.

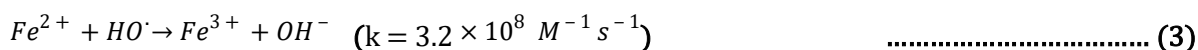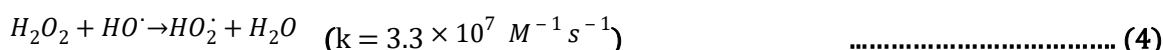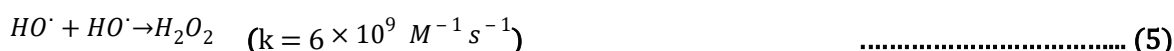

It's important to note that the rate constants mentioned here are obtained from the existing literature and are crucial parameters in understanding the kinetics of these reactions.

**β-D-glucose oxidation process: H<sub>2</sub>O<sub>2</sub> production**

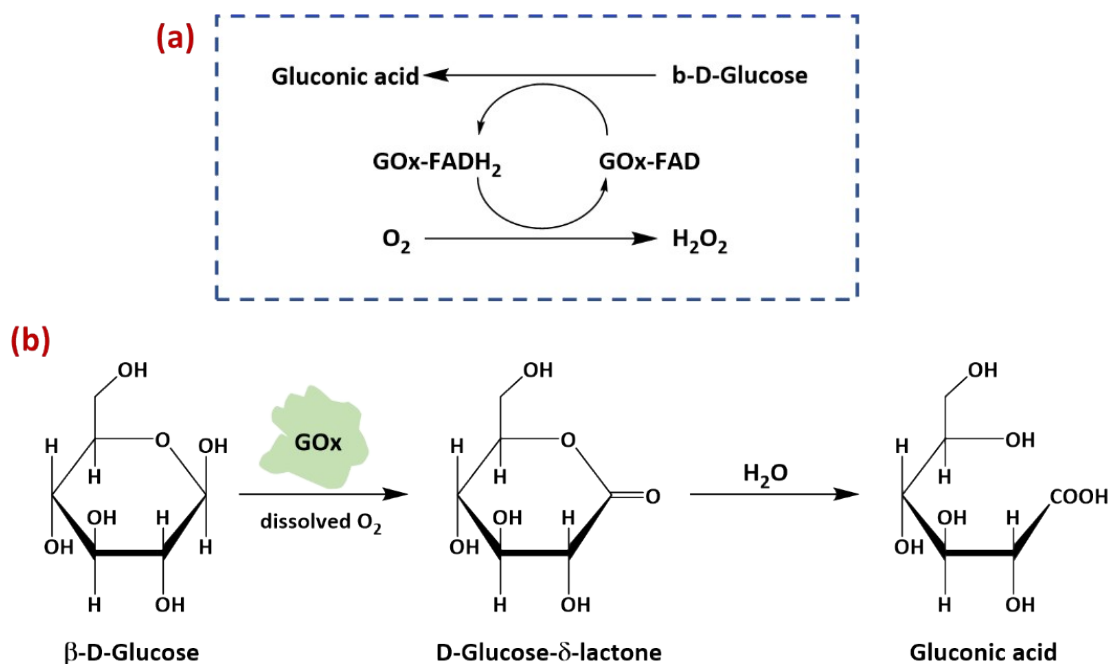

**Figure S1:** Enzymatic assisted removal of oxygen. Representation of GOx/D-glucose system: (a) schematic representation of H<sub>2</sub>O<sub>2</sub> generation, and (b) mechanism of β-D-glucose oxidation to produce gluconic acid in aqueous medium in the presence of molecular oxygen.

**Table S1:** Monomer Conversion (wt. %) concerning time for BMA homopolymerization. Reaction conditions utilized: Temperature = R.T., time = varied; reagent concentrations: BMA = 5% v/v, SDS = 1 wt. %, GOx/Fe(II) = 2  $\mu$ M/1 mM, D-glucose = 0.55 mM.

| Time    | Conversion $\Psi$<br>(wt. %) | $M_{n,GPC}^Y$<br>(g/mol) | $\mathcal{D}^Y$ |
|---------|------------------------------|--------------------------|-----------------|
| 5 min   | 65                           | 104,000                  | 1.77            |
| 10 min  | 67                           | 105,000                  | 1.82            |
| 15 min  | 68                           | 104,000                  | 1.85            |
| 30 min  | 70                           | 105,000                  | 1.81            |
| 1 hour  | 75                           | 105,000                  | 1.70            |
| 2 hours | 84                           | 104,000                  | 1.83            |
| 3 hours | 93                           | 105,000                  | 1.78            |
| 4 hours | 100                          | 105,000                  | 1.77            |

$\Psi$  Conversion (wt. %) was calculated gravimetrically, as discussed in the experimental section.  $^Y M_{n,GPC}$  and  $\mathcal{D}$  represent the Number average molecular weight and dispersity of the polymers obtained via GPC, respectively.

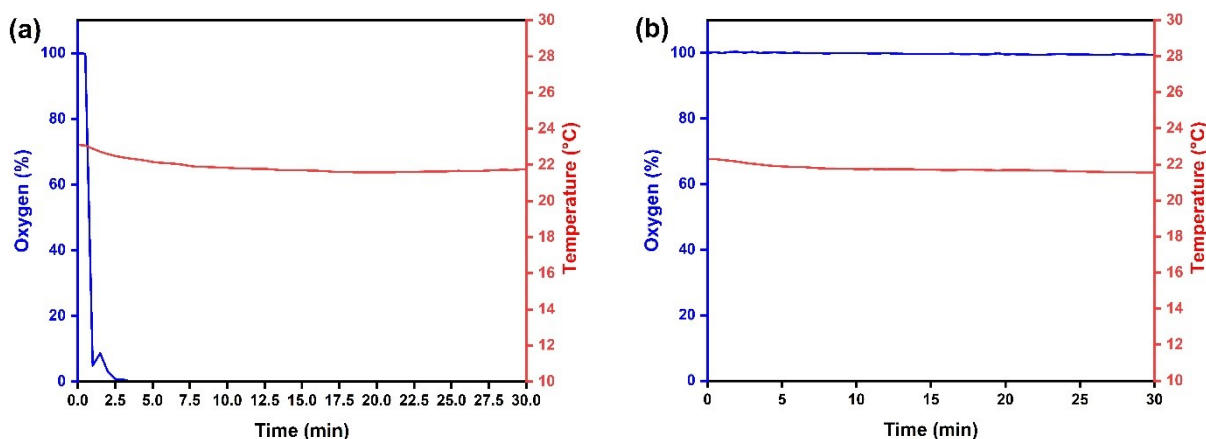

**Figure S2:** Monitoring the dissolved oxygen concentration of water-based solution containing (a) GOx and D-glucose, (b) only water, (c) D-glucose, and (d) GOx. Reaction conditions utilized: [GOx] = 2  $\mu$ M, D-glucose = 0.1 g.

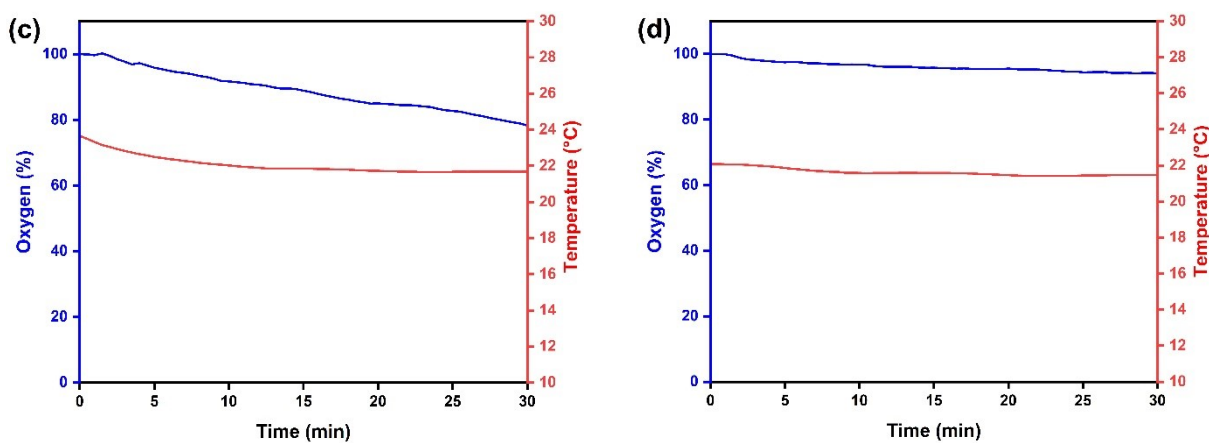

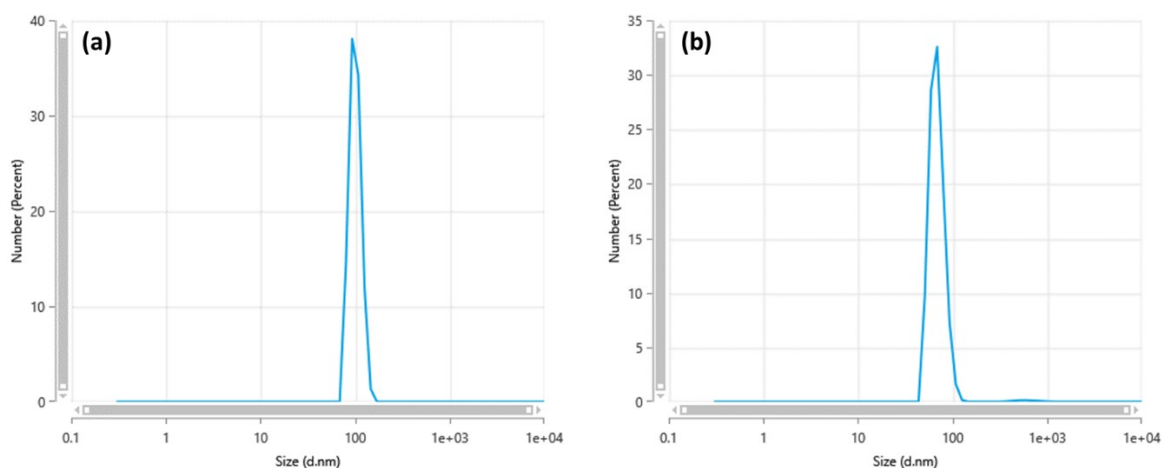

**Figure S3:** DLS Z-avg size of particles pre-polymerization for (a) Entry 10 and (b) Entry 12 from Table 1. The values were found to be 138.34 nm for 1 wt.% SDS (Entry 10) and 80.25 nm for 2.5 wt.% SDS (Entry 12).

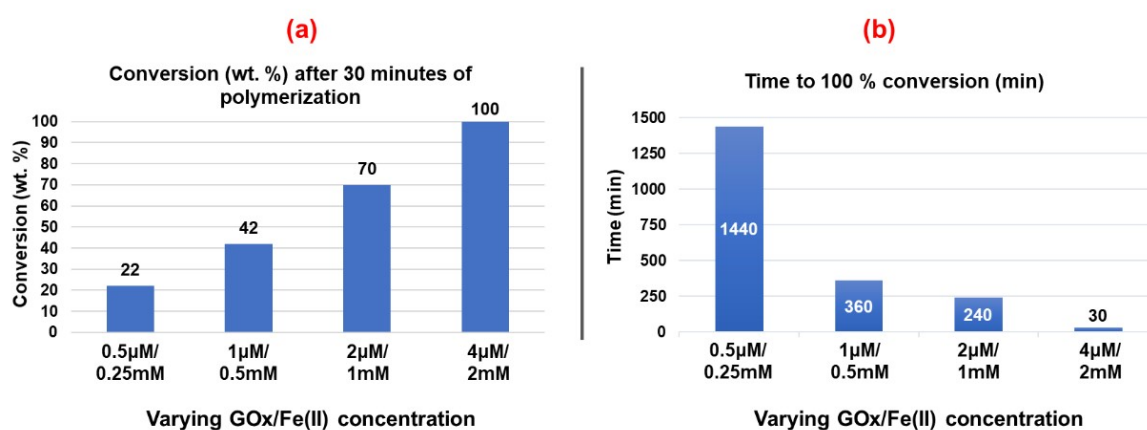

**Figure S4:** (a) Monomer conversion (wt.%) after 30 min of polymerization for each initiating catalyst system; (b) time (min) required for a full conversion of monomer under varying catalyst concentrations. Conditions utilized for these polymerizations: BMA = 5 % v/v, SDS = 1 wt. %, GOx/Fe(II) = varied, D-glucose = 0.55 mM.

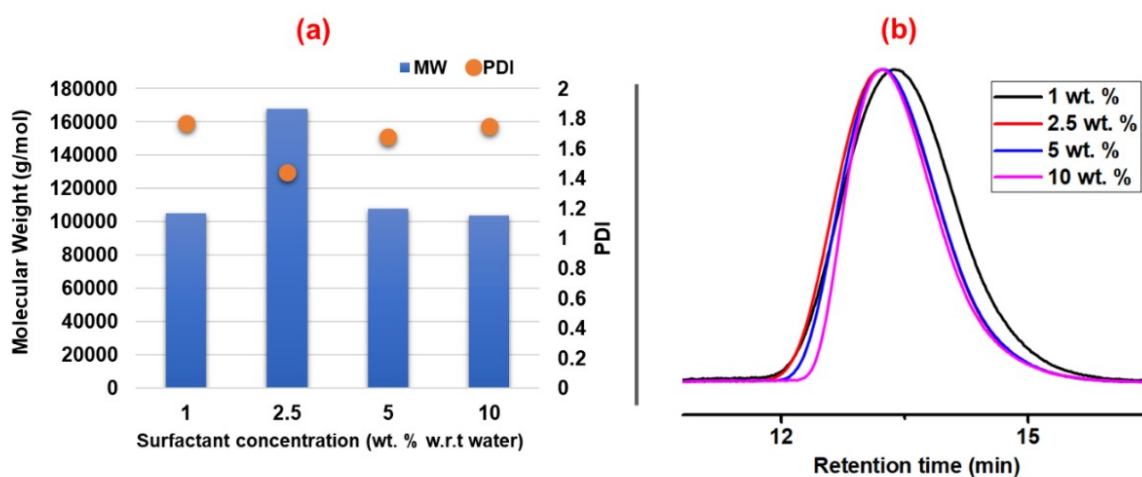

**Figure S5:** Effect of change in SDS concentration on (a) molecular weight and dispersity; (b) GPC traces of the polymers produced (PBMA). Conditions utilized for these polymerizations: BMA = 5 % v/v, SDS = varied, GOx/Fe(II) = 2 $\mu$ M/1mM, D-glucose = 0.55 mM.

**Table S2:** Effect of SDS concentration on molecular weight and dispersity of the polymers obtained. Conditions utilized for these polymerizations: BMA= 5 % v/v, GOx/Fe(II) = 2  $\mu$ M/1mM, D-glucose= 0.55 mM, SDS= varied.<sup>[a]</sup>

| SDS Concentration (wt. %) | Conversion <sup>[b]</sup> (wt. %) (after 5 min) | $M_n$ <sup>[c]</sup> (g/mol) | $\mathcal{D}$ <sup>[c]</sup> |
|---------------------------|-------------------------------------------------|------------------------------|------------------------------|
| 0.5                       | --                                              | --                           | --                           |
| 1                         | 65                                              | 105,000                      | 1.77                         |
| 2.5                       | > 99                                            | 168,000                      | 1.44                         |
| 5                         | > 99                                            | 108,000                      | 1.68                         |
| 10                        | > 99                                            | 104,000                      | 1.75                         |

<sup>[a]</sup>Reaction conditions: Temperature = R.T., stirring speed = 300 rpm. <sup>[b]</sup>Conversion (wt. %) was calculated gravimetrically, as discussed in the experimental section. <sup>[c]</sup> $M_n$  and  $\mathcal{D}$  were obtained from the GPC analysis.

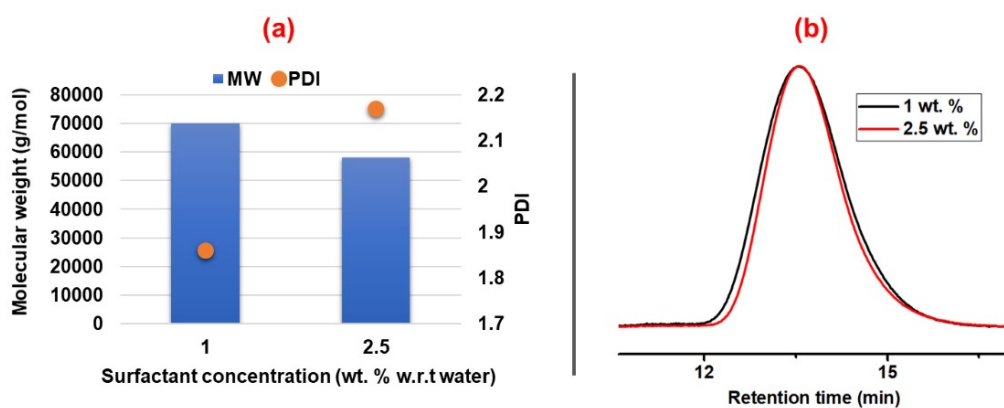

**Figure S6:** Effect of change in SDS concentration on (a) molecular weight and dispersity; (b) GPC traces of the polymers produced (PBMA). Conditions utilized for these polymerizations: BMA = 5 % v/v, SDS= varied, GOx/Fe(II) = 4  $\mu$ M/2 mM, D-glucose= 0.55 mM.

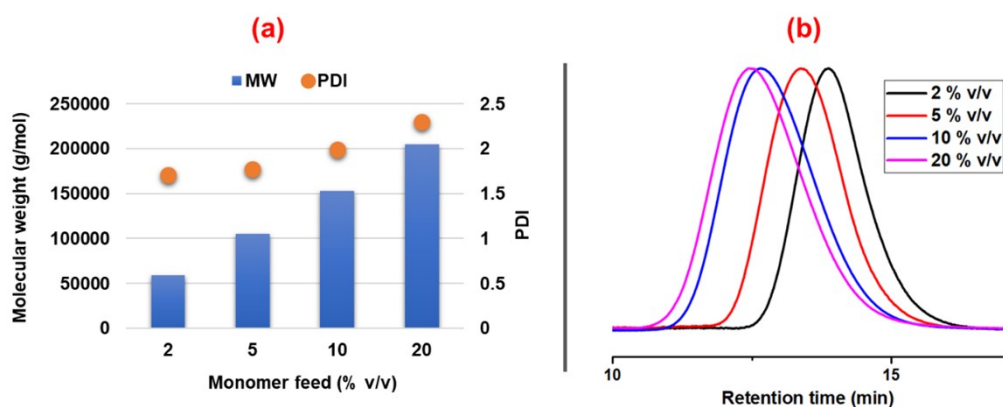

**Figure S7:** Effect of change in monomer concentration (% v/v w.r.t. water) on (a) molecular weight and dispersity; (b) GPC traces of the polymers produced (PBMA). Conditions utilized for these polymerizations: BMA= varied, SDS= 1 wt.%, GOx/Fe(II) = 2  $\mu$ M/1 mM, D-glucose= 0.55 mM.

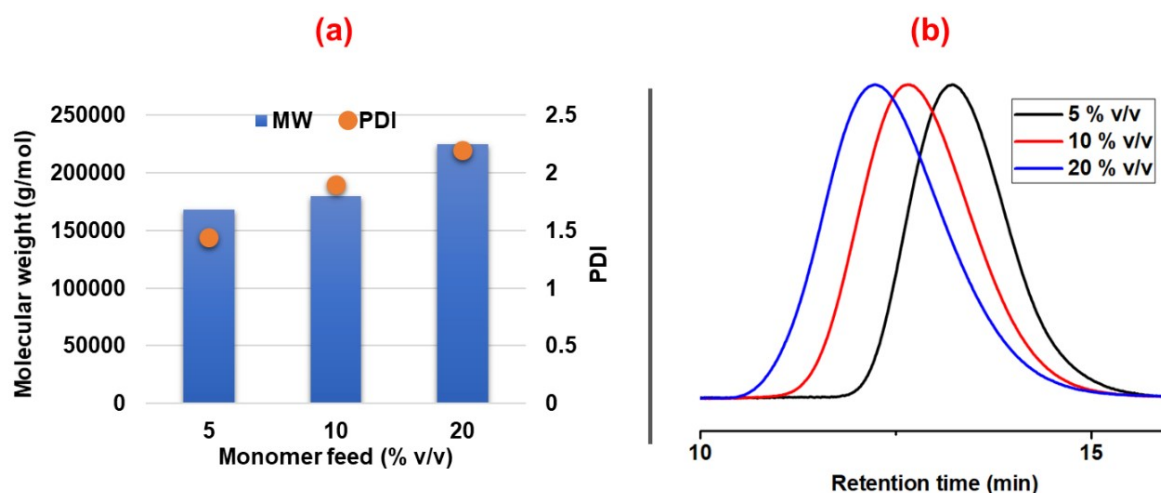

**Figure S8:** Effect of change in monomer concentration (% v/v w.r.t. water) on (a) molecular weight and dispersity; (b) GPC traces of the polymers produced (PBMA). Conditions utilized for these polymerizations: BMA= varied, SDS= 2.5 wt.%, GOx/Fe(II) = 2  $\mu$ M/1 mM, D-glucose= 0.55 mM.

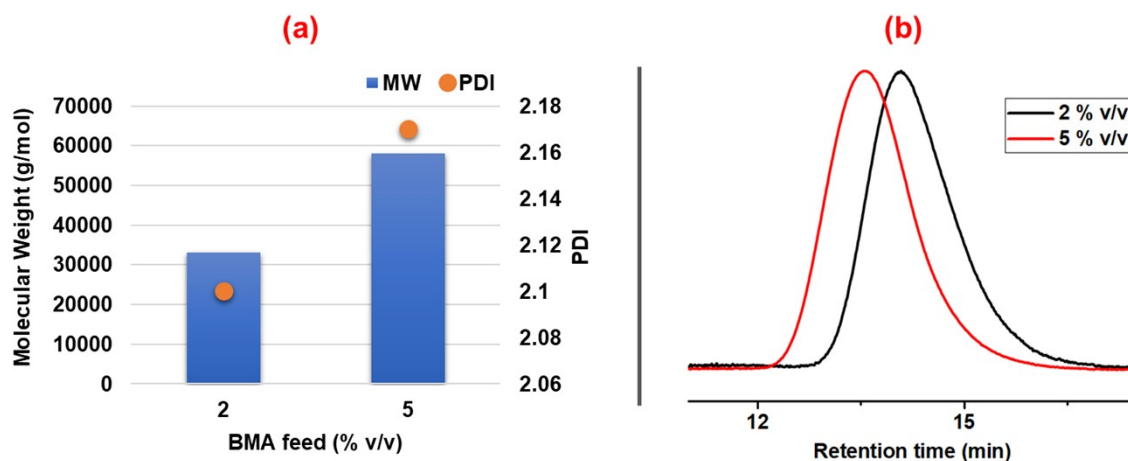

**Figure S9:** Effect of change in monomer concentration (% v/v w.r.t. water) on (a) molecular weight and dispersity; (b) GPC traces of the polymers produced (PBMA). Conditions utilized for these polymerizations: BMA= varied, SDS= 2.5 wt.%, GOx/Fe(II) = 4  $\mu$ M/2 mM, D-glucose= 0.55 mM.

**Table S3:** DLS measurement data of the latexes collected after polymerization using the semi bio-Fenton emulsion method.

| Entries <sup>a</sup> | Monomer | [BMA] <sub>0</sub><br>(v/v) | SDS<br>wt% | Z-<br>avg <sup>b</sup><br>(nm) | PdI   | <i>M<sub>n</sub></i> (g/mol) | <i>N<sub>c</sub></i><br>(Chains/particle) |
|----------------------|---------|-----------------------------|------------|--------------------------------|-------|------------------------------|-------------------------------------------|
| 1                    | BMA     | 5                           | 1          | 22.11                          | 0.172 | 105,000                      | 19                                        |
| 2                    | BMA     | 5                           | 1          | 23.36                          | 0.312 | 156,500                      | 16                                        |
| 3                    | BMA     | 5                           | 1          | 21.87                          | 0.379 | 120,000                      | 17                                        |
| 4                    | BMA     | 5                           | 1          | 19.98                          | 0.182 | 70,000                       | 20                                        |
| 5                    | BMA     | 5                           | 2.5        | 17.24                          | 0.283 | 168,000                      | 7                                         |
| 6                    | BMA     | 5                           | 5          | 14.65                          | 0.267 | 108,000                      | 6                                         |
| 7                    | BMA     | 5                           | 10         | 13.81                          | 0.258 | 104,000                      | 5                                         |
| 8                    | BMA     | 2                           | 1          | 15.88                          | 0.332 | 59,000                       | 13                                        |
| 9                    | BMA     | 10                          | 1          | 25.05                          | 0.259 | 153,000                      | 17                                        |
| 10                   | BMA     | 20                          | 1          | 34.40                          | 0.213 | 202,000                      | 29                                        |
| 11                   | BMA     | 10                          | 2.5        | 20.13                          | 0.219 | 180,000                      | 8                                         |
| 12                   | BMA     | 20                          | 2.5        | 32.30                          | 0.311 | 225,000                      | 23                                        |
| 13                   | BMA     | 2                           | 2.5        | 16.34                          | 0.340 | 33,000                       | 21                                        |
| 14                   | BMA     | 5                           | 2.5        | 20.05                          | 0.500 | 58,000                       | 21                                        |
| 15                   | BMA     | 20                          | 2.5        | 32.05                          | 0.650 | 185,000                      | 25                                        |
| 16                   | MMA     | 5                           | 2.5        | 16.95                          | 0.397 | 130,000                      | 7                                         |
| 17                   | VAc     | 5                           | 2.5        | 19.75                          | 0.378 | 135,000                      | 15                                        |

<sup>a</sup> GOx, Fe(II), and D-glucose amounts for all these polymerization reactions have been fixed at 2 μM, 1 mM, and 0.55 mM, respectively.

<sup>b</sup> The Z-average diameter was determined using a dynamic light scattering (DLS) instrument, calculated as the average of three measurements, and it denotes the particle diameter.

<sup>c</sup> *N<sub>c</sub>* was calculated based on the weight average molecular weight (*M<sub>w</sub>*) of the polymer and the Z-average size of the latex particle.<sup>[1]</sup> During this calculation, density of PBMA, PMMA and PVAc was assumed to be 1050, 1020, 1190 kg/m<sup>3</sup>, respectively.

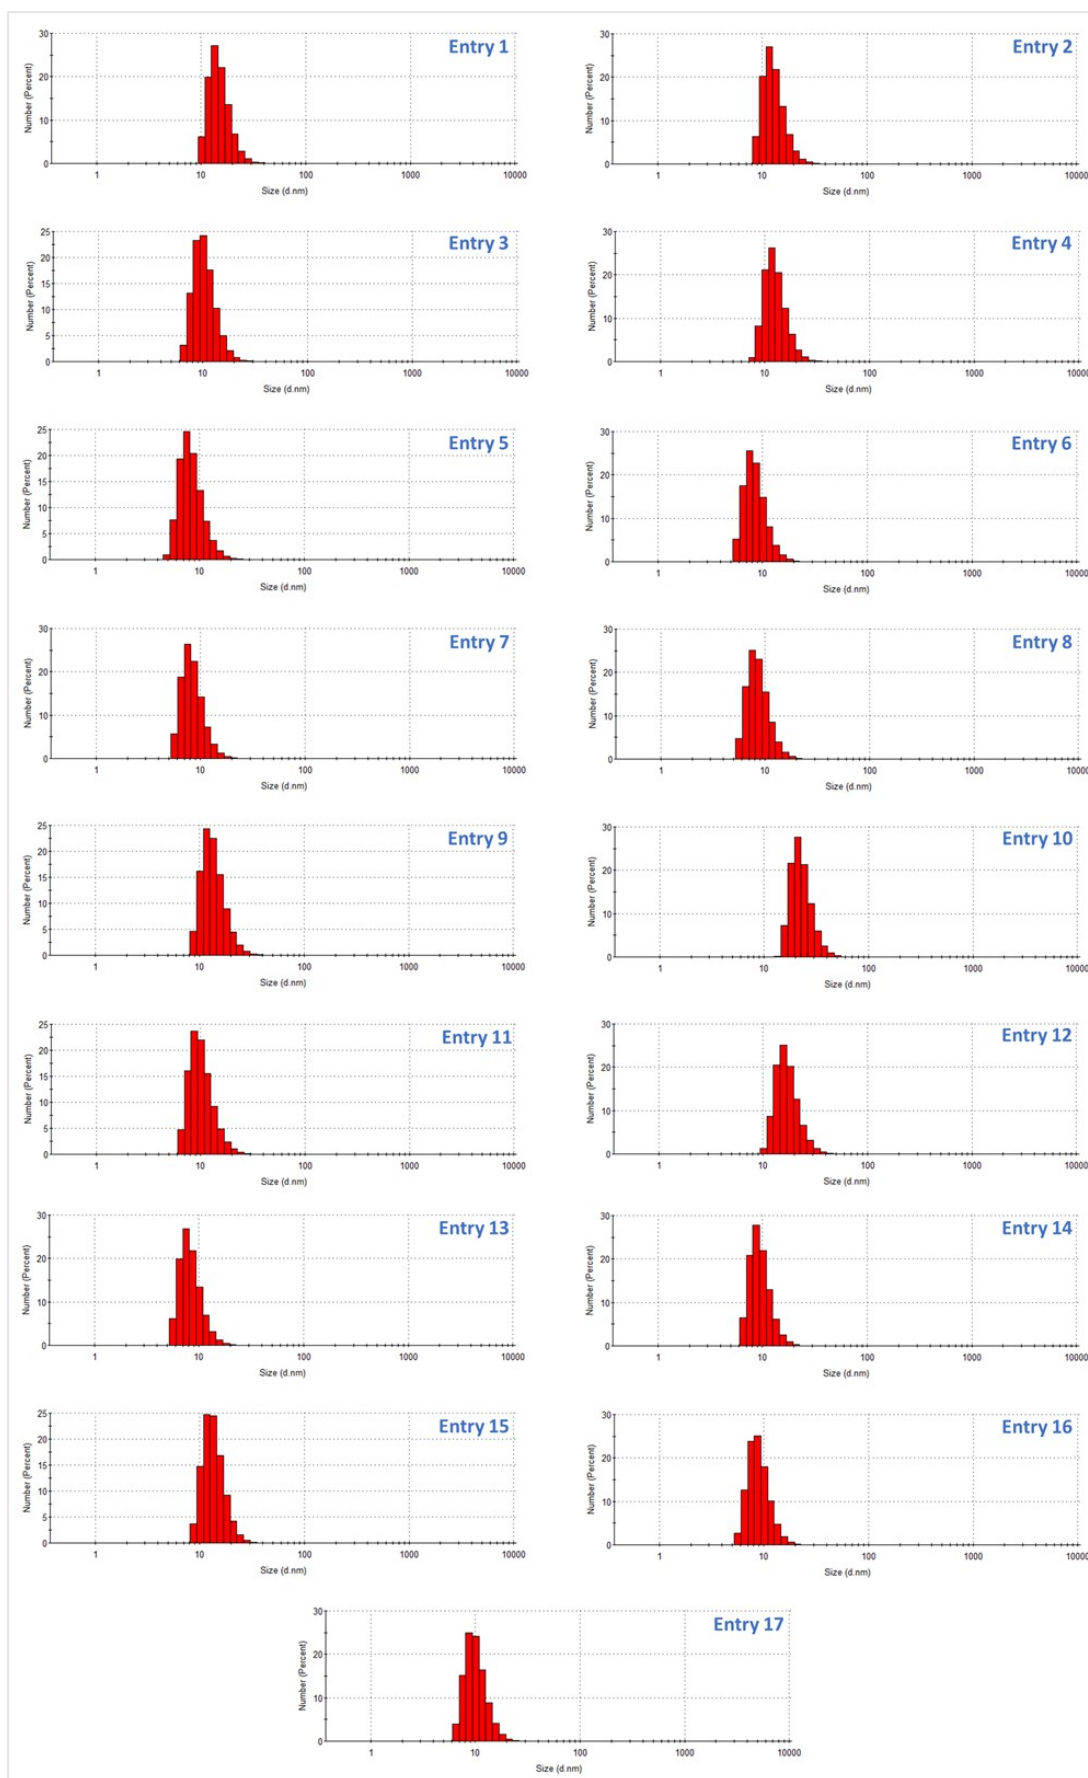

**Figure S10:** DLS data of the various latexes after polymerization.

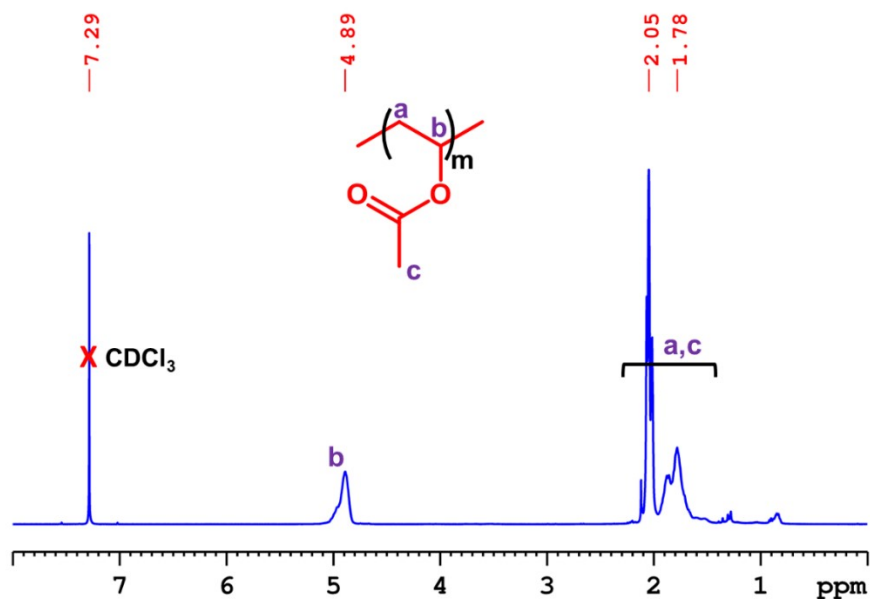

**Figure S11:** <sup>1</sup>H NMR of polyvinyl acetate (PVAc) in CDCl<sub>3</sub> synthesized using semi bio-Fenton emulsion polymerization. Successful preparation of the polymer is verified using this spectrum.

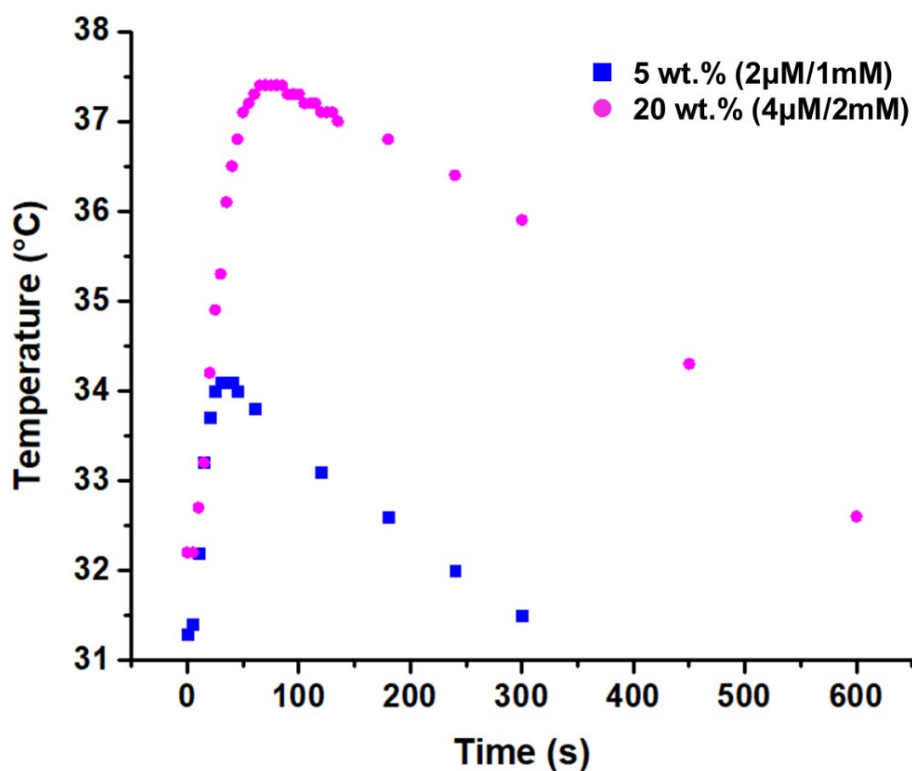

**Figure S12:** Change of temperature (°C) of the reaction mixture with time in seconds. Conditions utilized for the polymerizations: BMA = 5% v/v, SDS = 2.5 wt.%, GOx/Fe(II) = 2 μM/1 mM, D-glucose = 0.55 mM; and BMA = 20% v/v, SDS = 2.5 wt.%, GOx/Fe(II) = 4 μM/2 mM, D-glucose = 0.55 mM.

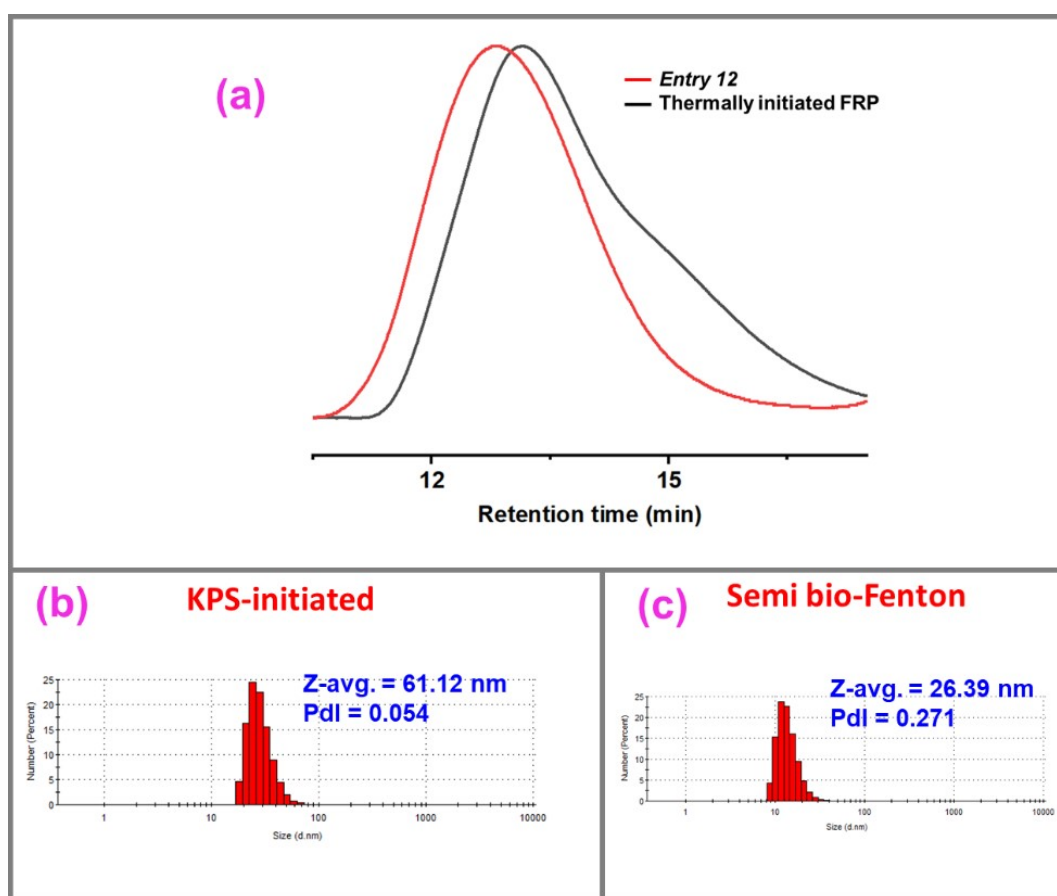

**Figure S13:** (a) GPC traces of *Entry 12* and a thermally initiated emulsion polymerization under identical conditions. Reaction conditions utilized for the thermally-initiated polymerization: BMA = 20% v/v of water, SDS = 2.5 wt.%, Potassium persulfate (KPS) = 1 wt.% of monomer; and for the semi bio-Fenton initiated emulsion polymerization: BMA = 20% v/v, SDS = 2.5 wt.%, GOx/Fe(II) = 2  $\mu$ M/1 mM, D-glucose = 0.55 mM. Under identical conditions, the  $\bar{D}$  recorded for *Entry 12* and the KPS-initiated (thermal) polymerization were 2.20 and 2.53, respectively. DLS data of (b) KPS-initiated emulsion polymerization and (c) semi bio-Fenton initiated emulsion polymerization.

**Table S4:** Reaction conditions used and the resulting data obtained after purging the reaction mixture with Argon with respect to *Entry 1*, Table 1.

| Variations <sup>a</sup> | Reaction time | $M_n$ (g/mol) | $\bar{D}$ | Yield (wt.%) |
|-------------------------|---------------|---------------|-----------|--------------|
| 5 min Argon purging     | 4 h           | 131,000       | 1.98      | 91           |
| 10 min Argon purging    | 4 h           | 87,820        | 2.21      | 90           |
| 30 min Argon purging    | 4 h           | 162,600       | 1.94      | 95           |
| 1 h Argon purging       | 4 h           | 100,700       | 1.97      | 86           |
| 2 h Argon purging       | 4 h           | 118,500       | 1.88      | 68           |

<sup>a</sup> GOx, Fe(II), and D-glucose amounts for all these polymerization reactions have been fixed at 0.5  $\mu$ M, 0.25 mM, and 0.55 mM, respectively.

## References:

- [1] U. Kalita, V. F. Jafari, M. Ashokkumar, N. K. Singha, G. G. Qiao, *Commun. Chem.* **2024**, *7*, 113.
